# Supplementary material for: Resveratrol induced premature senescence and inhibited epithelial-mesenchymal transition of cancer cells via induction of tumor suppressor Rad9
Source: PubMed Central journal article supplement (PMC6634400; doi:10.1371/journal.pone.0219317), 2019-07-16
Supplement: pone.0219317.s004.pdf [file pone.0219317.s004.pdf]

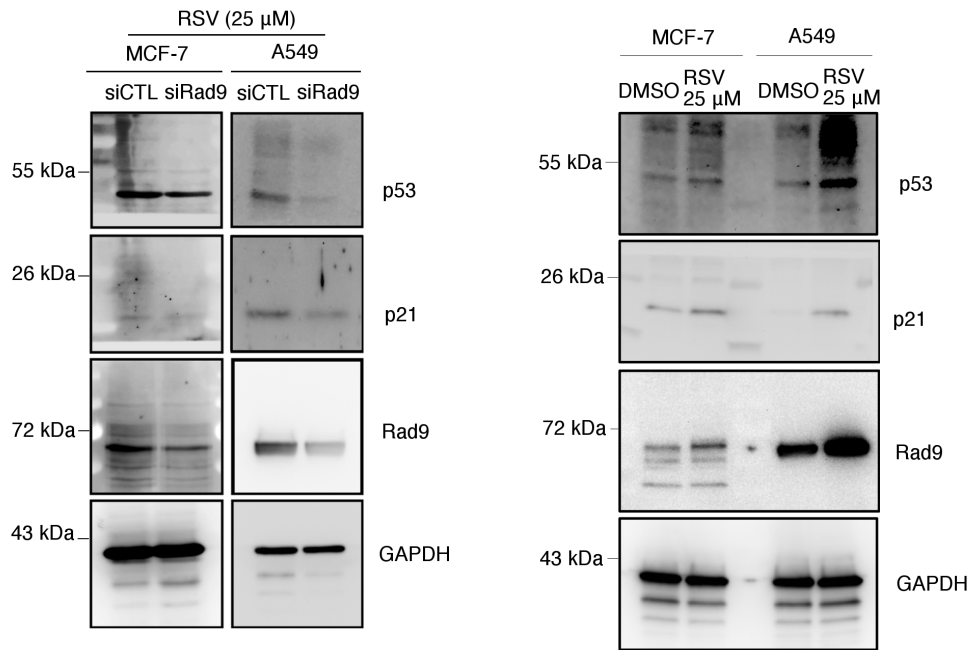

**Supplementary Fig S4.** Full-length images of the western blots illustrated in Figure 5B.
