# Supplementary material for: Resveratrol induced premature senescence and inhibited epithelial-mesenchymal transition of cancer cells via induction of tumor suppressor Rad9
Source: PubMed Central journal article supplement (PMC6634400; doi:10.1371/journal.pone.0219317), 2019-07-16
Supplement: pone.0219317.s007.pdf [file pone.0219317.s007.pdf]

**Supplementary Table 1.** The values used to build graphs in (A) Figure 1, (B) Figure 2A and 2C, (C) Figure 3A, (D) Figure 4A, (E) Figure 5A, (F) Figure 6B.

A.

| cell        | control |      | RSV 12.5 $\mu$ M |       | RSV 25 $\mu$ M |       | RSV 50 $\mu$ M |      |
|-------------|---------|------|------------------|-------|----------------|-------|----------------|------|
|             | MCF-7   | A549 | MCF-7            | A549  | MCF-7          | A549  | MCF-7          | A549 |
| cell number | 100     | 100  | 91               | 91    | 77             | 21    | 45             | 2    |
|             | 105     | 105  | 98               | 89    | 68             | 30    | 39             | 4    |
|             | 98      | 104  | 101              | 85    | 73             | 28    | 41             | 5    |
| mean        | 101     | 103  | 96.67            | 88.33 | 72.67          | 26.33 | 41.67          | 3.67 |
| S.D.        | 2.944   | 2.16 | 4.19             | 2.494 | 3.682          | 3.859 | 2.494          | 1.25 |

B.

| cell              | DMSO  |      | RSV 25 $\mu$ M |       |
|-------------------|-------|------|----------------|-------|
|                   | MCF-7 | A549 | MCF-7          | A549  |
| positive cell (%) | 0.64  | 1.00 | 24.00          | 41.67 |
|                   | 0.78  | 1.04 | 40.00          | 50.00 |
|                   | 0.47  | 0.95 | 33.33          | 28.57 |
| mean              | 0.63  | 0.99 | 32.44          | 40.08 |
| S.D.              | 0.13  | 0.04 | 6.56           | 8.82  |

| cell                | DMSO  |      | RSV 25 $\mu$ M |      |
|---------------------|-------|------|----------------|------|
|                     | MCF-7 | A549 | MCF-7          | A549 |
| relative mRNA level | 1.4   | 1.2  | 3.78           | 2.37 |
|                     | 1.3   | 1.5  | 4.1            | 2.55 |
|                     | 1.1   | 1.2  | 3.5            | 2.8  |
| mean                | 1.27  | 1.30 | 3.79           | 2.57 |
| S.D.                | 0.12  | 0.14 | 0.25           | 0.18 |

C.

|                         | DMSO | 25 $\mu$ M RSV | 50 nM NS | 25 $\mu$ M RSV + 50 nM NS | mean  | S.D.  |
|-------------------------|------|----------------|----------|---------------------------|-------|-------|
| MCF-7 positive cell (%) | 0    | 33             | 10       | 10                        | 13.25 | 12.11 |
|                         | 0    | 50             | 10       | 20                        | 20.00 | 18.71 |
|                         | 10   | 50             | 20       | 25                        | 26.25 | 14.74 |
|                         | 10   | 33             | 0        | 25                        | 17.00 | 12.83 |
|                         | 0    | 50             | 0        | 20                        | 17.50 | 20.46 |
| A549 positive cell (%)  | 10   | 50             | 0        | 20                        | 20.00 | 18.71 |
|                         | 0    | 33             | 10       | 33                        | 19.00 | 14.44 |
|                         | 0    | 50             | 20       | 25                        | 23.75 | 17.81 |
|                         | 10   | 25             | 10       | 20                        | 16.25 | 6.50  |
|                         | 10   | 33             | 10       | 20                        | 18.25 | 9.44  |

D.

| cell                  | MCF-7 |       |           | A549 |       |           |
|-----------------------|-------|-------|-----------|------|-------|-----------|
| condition             | DMSO  | NAC   | NAC + RSV | DMSO | NAC   | NAC + RSV |
| DCF positive cell (%) | 12.37 | 90.48 | 61.11     | 3.7  | 38.98 | 2.13      |
|                       | 0     | 85.71 | 10.43     | 1.16 | 56.32 | 9.62      |
|                       | 0     | 86.21 | 21.43     | 0    | 56.25 | 18.97     |
|                       | 0     | 54.55 | 13.89     | 0    | 63.16 | 23.86     |
|                       | 0     | 95.56 | 11.69     | 0    | 60.98 | 19.15     |
|                       | 0     | 56.47 | 16.13     | 0    | 53.28 | 10.2      |
|                       | 0     | 74.39 | 30.77     | 0    | 54.1  | 8.06      |
|                       | 0     | 71.88 | 58.06     | 0    | 55.3  | 12.1      |
| 0                     | 85.71 | 21.43 | 0         | 53.8 | 13.5  |           |
| mean                  | 1.37  | 77.88 | 27.22     | 0.54 | 54.69 | 13.07     |
| S.D.                  | 3.89  | 13.80 | 18.27     | 1.17 | 6.38  | 6.27      |

E.

| cell              | MCF-7  |        | A549  |        |
|-------------------|--------|--------|-------|--------|
| condition         | siCTL  | siRad9 | siCTL | siRad9 |
| positive cell (%) | 30.769 | 13.636 | 50    | 11.905 |
|                   | 35.294 | 12.121 | 55.56 | 10     |
|                   | 46.154 | 18.75  | 55.56 | 10.256 |
| mean              | 37.41  | 14.84  | 53.70 | 10.72  |
| S.D.              | 6.46   | 2.84   | 2.62  | 0.84   |

F.

| cell        | MCF-7 |                |       |        | A549   |                |       |        |
|-------------|-------|----------------|-------|--------|--------|----------------|-------|--------|
| condition   | DMSO  | RSV 25 $\mu$ M | siCTL | siRad9 | DMSO   | RSV 25 $\mu$ M | siCTL | siRad9 |
| cell number | 77    | 34             | 44    | 67     | 110    | 45             | 37    | 88     |
|             | 82    | 31             | 59    | 74     | 105    | 51             | 21    | 65     |
|             | 72    | 47             | 50    | 81     | 97     | 47             | 56    | 105    |
| mean        | 77.00 | 37.33          | 51.00 | 74.00  | 104.00 | 47.67          | 38.00 | 86.00  |
| S.D.        | 4.08  | 6.94           | 6.16  | 5.72   | 5.35   | 2.49           | 14.31 | 16.39  |
